# Supplementary material for: The use of calcium hydroxide pretreatment to overcome agglomeration of technical lignin during fast pyrolysis
Source: Royal Society of Chemistry journal article supplement (doi:10.1039/c5gc01611h), 2015-01-01
Supplement: c5gc01611h1.pdf [file c5gc01611h1.pdf]

The Use of Calcium Hydroxide Pretreatment to Overcome Agglomeration of Technical Lignin during  
Fast Pyrolysis

Shuai Zhou<sup>1</sup>, Robert C. Brown<sup>2</sup>, Xianglan Bai<sup>2\*</sup>

<sup>1</sup>Bioeconomy Institute, Iowa State University, Ames, Iowa 50011, United States

<sup>2</sup>Department of Mechanical Engineering, Iowa State University, Ames, Iowa 50011, United States

-Supplemental Tables and Figures

Table S1. Ultimate and proximate analysis of lignin.

---

| <i>Ultimate analysis (wt%)</i> |       |
|--------------------------------|-------|
| Carbon                         | 61.34 |
| Hydrogen                       | 4.67  |
| Nitrogen                       | 2.00  |
| Sulfur                         | 0.20  |
| Oxygen*                        | 31.79 |

  

| <i>Proximate analysis (wt%)</i> |       |
|---------------------------------|-------|
| Moisture content                | 3.87  |
| Volatiles                       | 62.52 |
| Fixed carbon                    | 27.55 |
| Ash                             | 6.07  |

---

\*Determined by difference

Table S2. Compositional analysis of bio-oil by GC/MS.

| Compound (% per lignin)              | Temperature (°C) |             |             |             |
|--------------------------------------|------------------|-------------|-------------|-------------|
|                                      | 450              | 500         | 550         | 600         |
| Acetic acid                          | 4.81 ± 0.31      | 3.71 ± 0.11 | 3.99 ± 0.07 | 4.12 ± 0.31 |
| Acetol                               | 0.26 ± 0.01      | 0.19 ± 0.18 | 0.17 ± 0.02 | 0.14 ± 0.02 |
| Acetol acetate                       | 0.09 ± 0.01      | 0.07 ± 0.00 | 0.07 ± 0.00 | 0.05 ± 0.01 |
| Phenol                               | 0.33 ± 0.01      | 0.34 ± 0.03 | 0.36 ± 0.02 | 0.41 ± 0.04 |
| 2-Methoxy-Phenol                     | 0.28 ± 0.06      | 0.26 ± 0.01 | 0.17 ± 0.01 | 0.17 ± 0.05 |
| P-Cresol                             | 0.19 ± 0.00      | 0.21 ± 0.02 | 0.22 ± 0.01 | 0.25 ± 0.01 |
| Creosol                              | 0.19 ± 0.01      | 0.17 ± 0.02 | 0.14 ± 0.00 | 0.14 ± 0.01 |
| 4-Ethyl-phenol                       | 0.22 ± 0.02      | 0.20 ± 0.01 | 0.17 ± 0.03 | 0.16 ± 0.01 |
| 4-Ethyl-2-methoxy-phenol,            | 0.18 ± 0.01      | 0.16 ± 0.02 | 0.14 ± 0.02 | 0.06 ± 0.00 |
| 4-Vinyl-Phenol                       | 2.79 ± 0.23      | 2.64 ± 0.17 | 2.53 ± 0.17 | 2.08 ± 0.07 |
| 2-Methoxy-4-vinylphenol              | 1.29 ± 0.10      | 1.12 ± 0.07 | 0.69 ± 0.02 | 0.50 ± 0.01 |
| 2,6-Dimethoxy-Phenol                 | 0.25 ± 0.01      | 0.22 ± 0.04 | 0.12 ± 0.01 | 0.06 ± 0.00 |
| Isoeugenol                           | 0.14 ± 0.01      | 0.13 ± 0.01 | 0.11 ± 0.00 | 0.11 ± 0.01 |
| 1,2,4-Trimethoxybenzene              | 0.10 ± 0.00      | 0.08 ± 0.00 | 0.04 ± 0.00 | 0.01 ± 0.00 |
| Vanillin                             | 0.15 ± 0.01      | 0.12 ± 0.01 | 0.09 ± 0.01 | 0.06 ± 0.02 |
| 1,2,3-Trimethoxy-5-methyl- Benzene   | 0.05 ± 0.00      | 0.04 ± 0.02 | 0.03 ± 0.00 | 0.02 ± 0.01 |
| 3',5'-Dimethoxyacetophenone          | 0.20 ± 0.01      | 0.17 ± 0.02 | 0.11 ± 0.01 | 0.07 ± 0.03 |
| 2,6-Dimethoxy-4-(2-propenyl)- phenol | 0.16 ± 0.01      | 0.10 ± 0.01 | 0.06 ± 0.00 | 0.04 ± 0.00 |

Table S3. Properties of heavy oil and light oil.

| Temperature (°C)              |                         | 450       | 500    | 550    | 600    |       |
|-------------------------------|-------------------------|-----------|--------|--------|--------|-------|
| Bio-oil yield (%)             | Heavy oil               | 20.93     | 22.53  | 20.28  | 18.25  |       |
|                               | Light oil               | 16.49     | 15.84  | 18.03  | 18.78  |       |
| Water (%)                     | In heavy oil            | 5.48      | 3.24   | 2.44   | 3.67   |       |
|                               | In light oil            | 65.17     | 75.59  | 69.89  | 54.06  |       |
|                               | Based                   | 11.89     | 12.70  | 12.71  | 10.83  |       |
| Molecular weight distribution | Heavy oil               |           |        |        |        |       |
|                               | Mw (Da)                 | 288       | 297    | 290    | 300    |       |
|                               | Mn (Da)                 | 181       | 182    | 180    | 180    |       |
|                               | PD                      | 1.59      | 1.63   | 1.61   | 1.67   |       |
|                               | Light oil               |           |        |        |        |       |
|                               | Mw (Da)                 | 224       | 239    | 187    | 153    |       |
|                               | Mn (Da)                 | 119       | 131    | 134    | 109    |       |
|                               | PD                      | 1.88      | 1.82   | 1.40   | 1.40   |       |
| MAN (mg KOH/g)                | Heavy oil               | 38.99     | 34.70  | 32.85  | 37.48  |       |
|                               | Light oil               | 221.73    | 204.47 | 214.05 | 250.48 |       |
| Elemental composition (%)     | Heavy oil               |           |        |        |        |       |
|                               | C                       | 67.98     | 68.89  | 69.39  | 69.94  |       |
|                               | H                       | 6.99      | 6.97   | 6.87   | 6.06   |       |
|                               | O*                      | 23.05     | 21.85  | 21.31  | 21.47  |       |
|                               | N                       | 1.93      | 2.25   | 2.39   | 2.50   |       |
|                               | S                       | 0.05      | 0.04   | 0.04   | 0.03   |       |
|                               | Light oil               |           |        |        |        |       |
|                               | C                       | 13.33     | 13.88  | 12.66  | 14.59  |       |
|                               | H                       | 6.82      | 8.38   | 6.81   | 7.02   |       |
|                               | O*                      | 78.89     | 76.75  | 79.24  | 76.82  |       |
|                               | N                       | 0.95      | 0.98   | 1.27   | 1.55   |       |
|                               | S                       | 0.01      | 0.01   | 0.02   | 0.02   |       |
|                               | Heating value (MJ/kg)** | Heavy oil | 28.90  | 29.31  | 29.4   | 28.38 |
|                               |                         | Light oil | 4.97   | 4.61   | 1.54   | 2.81  |

\*by difference; \*\* calculated based on the formula provided in reference.<sup>42</sup>

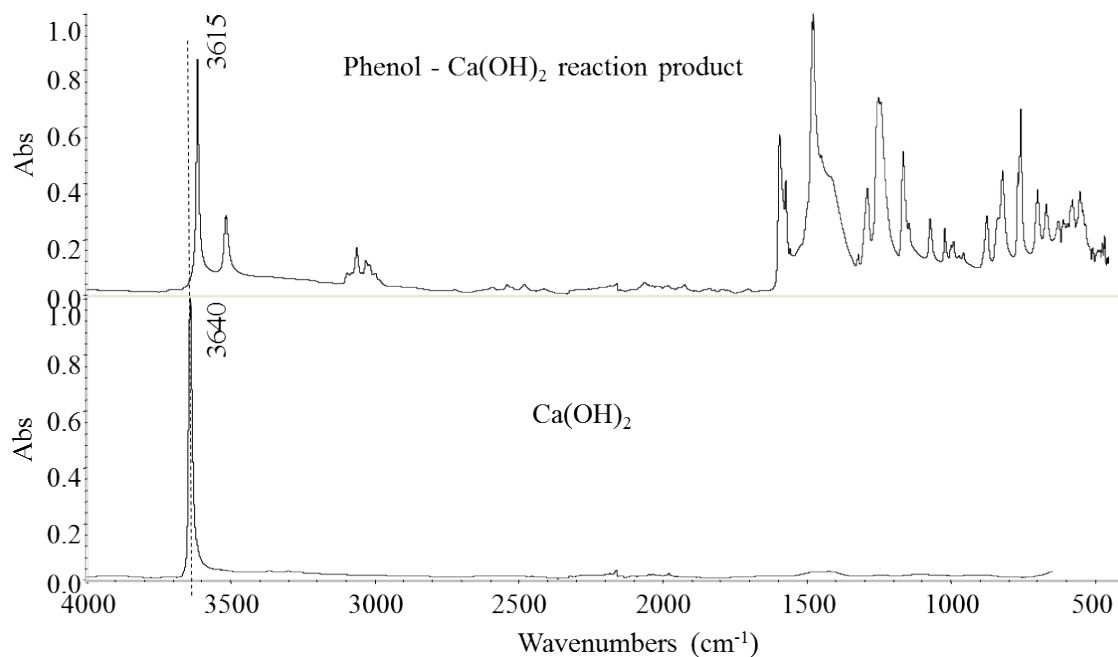

Fig. S1. FTIR spectrum of the Ca(OH)<sub>2</sub> treated phenol at 50 °C (top) compared to the spectrum of Ca(OH)<sub>2</sub> (bottom). According to reference [40], the peak at 3615 cm<sup>-1</sup> and several smaller peaks with the wavenumbers below 700 cm<sup>-1</sup> do not appear at the spectrum of calcium diphenoxide but they appear for hydroxycalcium phenoxide.

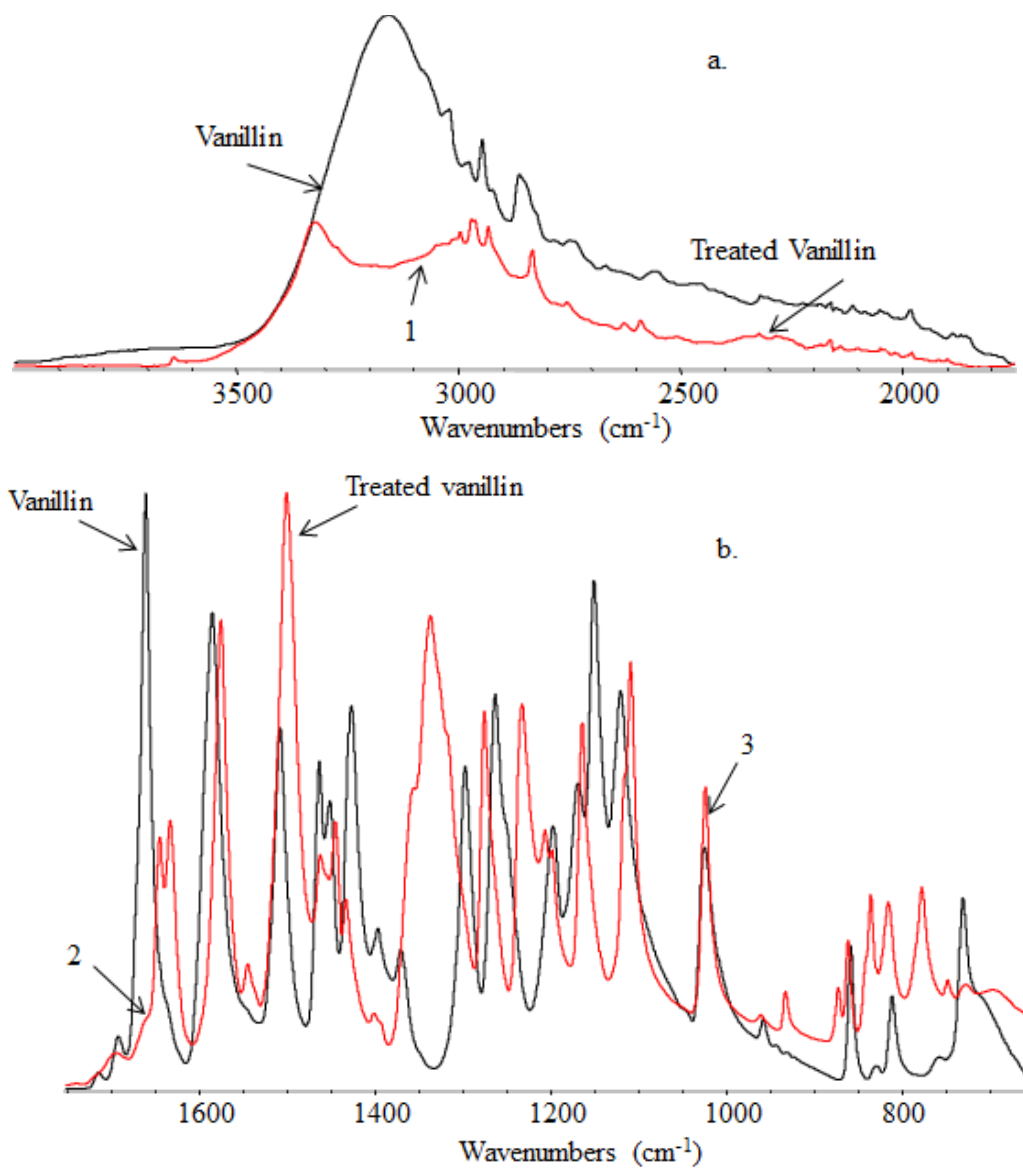

Fig. S2. Comparison of FTIR spectrum of vanillin and Ca(OH)<sub>2</sub> treated vanillin; a. 1750-4000 cm<sup>-1</sup>; b. 650-1750 cm<sup>-1</sup>; 1. Reduced OH group; 2. Reduced aldehyde group; 3. Formation of alcohol group.
